# Supplementary material for: Protein oxidation of fucose environments (POFE) reveals fucose–protein interactions
Source: Royal Society of Chemistry journal article supplement (doi:10.1039/d3sc06432h), 2024-01-01
Supplement: d3sc06432h2.xlsx [file d3sc06432h2.xlsx]

## Sheet: cell component analysis
source	term_name	term_id	adjusted_p_value	negative_log10_of_adjusted_p_value	term_size	query_size	intersection_size	effective_domain_size	intersections
GO:CC	organelle	GO:0043226	8.18218e-07	6.08713	16766	128	122	22090	A0FGR8	O75396	O75882	P00533	P02545	P02786	P04406	P05023	P05026	P05362	P05556	P07437	P08238	P09429	P09758	P10321	P11142	P14618	P15144	P15924	P16070	P17706	P17931	P20337	P21333	P25705	P26038	P27348	P27797	P29692	P35221	P35222	P35579	P35613	P37802	P39023	P48735	P50454	P60709	P61513	P62070
GO:CC	membrane-bounded organelle	GO:0043227	3.32562e-09	8.47813	15624	128	121	22090	A0FGR8	O75396	O75882	P00533	P02545	P02786	P04406	P05023	P05026	P05362	P05556	P07437	P08238	P09429	P09758	P10321	P11142	P14618	P15144	P15924	P16070	P17706	P17931	P20337	P21333	P25705	P26038	P27348	P27797	P29692	P35221	P35222	P35579	P35613	P37802	P39023	P48735	P50454	P60709	P61513	P62070
GO:CC	intracellular anatomical structure	GO:0005622	0.00527583	2.27771	17772	128	120	22090	A0FGR8	O75396	O75882	P00533	P02545	P02786	P04406	P05023	P05556	P07437	P08238	P09429	P09758	P10321	P11142	P14618	P15144	P15924	P16070	P17706	P17931	P20337	P21333	P22223	P25705	P26038	P27348	P27797	P29692	P35221	P35222	P35579	P35613	P37802	P39023	P48735	P50454	P60709	P61513	P62070	P62937
GO:CC	cytoplasm	GO:0005737	1.12961e-17	16.9471	12251	128	118	22090	A0FGR8	O75396	O75882	P00533	P02545	P02786	P04406	P05023	P05556	P07437	P08238	P09429	P09758	P10321	P11142	P14618	P15144	P15924	P16070	P17706	P17931	P20337	P21333	P22223	P25705	P26038	P27348	P27797	P29692	P35221	P35222	P35579	P35613	P37802	P39023	P48735	P50454	P60709	P61513	P62070	P62937
GO:CC	intracellular organelle	GO:0043229	8.02377e-05	4.09562	15969	128	116	22090	A0FGR8	O75396	O75882	P00533	P02545	P02786	P04406	P05023	P05556	P07437	P08238	P09429	P09758	P10321	P11142	P14618	P15144	P15924	P16070	P17706	P17931	P20337	P21333	P25705	P26038	P27797	P29692	P35221	P35222	P35579	P35613	P37802	P39023	P48735	P50454	P60709	P61513	P62070	P62937	P63000	P63010
GO:CC	membrane	GO:0016020	1.08997e-22	21.9626	9853	128	113	22090	A0FGR8	O75396	O75882	O96005	P00533	P02545	P02786	P04406	P05023	P05026	P05187	P05362	P05556	P07437	P08238	P09429	P09758	P10321	P11142	P15144	P15924	P16070	P17706	P17931	P20337	P21333	P22223	P25705	P26038	P27348	P27797	P35221	P35222	P35579	P35613	P50454	P60709	P62070	P62937	P63000	P63010
GO:CC	intracellular membrane-bounded organelle	GO:0043231	5.99864e-06	5.22195	14560	128	112	22090	A0FGR8	O75396	O75882	P00533	P02545	P02786	P04406	P05023	P05556	P07437	P08238	P09429	P09758	P10321	P11142	P14618	P15144	P15924	P16070	P17706	P17931	P20337	P21333	P25705	P26038	P27797	P29692	P35221	P35222	P35579	P35613	P39023	P48735	P50454	P60709	P61513	P62070	P62937	P63000	P63010	P67809
GO:CC	vesicle	GO:0031982	8.00289e-44	43.0968	3976	128	97	22090	O75396	O75882	P00533	P02786	P04406	P05023	P05026	P05362	P05556	P07437	P08238	P09429	P09758	P10321	P11142	P14618	P15144	P15924	P16070	P17706	P17931	P20337	P21333	P25705	P26038	P27348	P27797	P35221	P35222	P35579	P35613	P37802	P39023	P48735	P60709	P61513	P62070	P62937	P63000	P63010	P67809
GO:CC	cell periphery	GO:0071944	3.6727e-23	22.435	6202	128	93	22090	A0FGR8	O75882	O96005	P00533	P02786	P04406	P05023	P05026	P05187	P05362	P05556	P08238	P09429	P09758	P10321	P11142	P14618	P15144	P15924	P16070	P17706	P17931	P20337	P21333	P22223	P25705	P26038	P27797	P35221	P35222	P35579	P35613	P50454	P60709	P62070	P63000	P63010	P67809	P68104	Q00610	Q01082
GO:CC	plasma membrane	GO:0005886	1.92392e-23	22.7158	5717	128	90	22090	A0FGR8	O75882	O96005	P00533	P02786	P04406	P05023	P05026	P05187	P05362	P05556	P08238	P09429	P09758	P10321	P11142	P15144	P15924	P16070	P17706	P17931	P20337	P21333	P22223	P25705	P26038	P27797	P35221	P35222	P35579	P35613	P60709	P62070	P63000	P63010	P67809	P68104	Q00610	Q01082	Q01844	Q04912
GO:CC	extracellular region	GO:0005576	3.71429e-31	30.4301	4206	128	87	22090	O75882	P00533	P02786	P04406	P05023	P05026	P05362	P05556	P07437	P08238	P09429	P09758	P10321	P11142	P14618	P15144	P15924	P16070	P17931	P20337	P21333	P25705	P26038	P27348	P27797	P35222	P35579	P35613	P37802	P39023	P48735	P50454	P60709	P61513	P62070	P62937	P63000	P67809	P68104	P68366	P68371
GO:CC	extracellular space	GO:0005615	1.19933e-38	37.9211	3284	128	86	22090	O75882	P00533	P02786	P04406	P05023	P05026	P05362	P05556	P07437	P08238	P09429	P09758	P10321	P11142	P14618	P15144	P15924	P16070	P17931	P20337	P21333	P25705	P26038	P27348	P27797	P35222	P35579	P35613	P37802	P39023	P48735	P50454	P60709	P61513	P62070	P62937	P63000	P67809	P68104	P68366	P68371
GO:CC	extracellular exosome	GO:0070062	2.78599e-49	48.555	2109	128	82	22090	O75882	P02786	P04406	P05023	P05026	P05362	P05556	P07437	P08238	P09758	P10321	P11142	P14618	P15144	P15924	P16070	P17931	P20337	P21333	P25705	P26038	P27348	P27797	P35222	P35579	P35613	P37802	P39023	P48735	P60709	P61513	P62070	P62937	P63000	P67809	P68104	P68366	P68371	Q00610	Q01082	Q12907
GO:CC	extracellular vesicle	GO:1903561	6.79436e-49	48.1679	2133	128	82	22090	O75882	P02786	P04406	P05023	P05026	P05362	P05556	P07437	P08238	P09758	P10321	P11142	P14618	P15144	P15924	P16070	P17931	P20337	P21333	P25705	P26038	P27348	P27797	P35222	P35579	P35613	P37802	P39023	P48735	P60709	P61513	P62070	P62937	P63000	P67809	P68104	P68366	P68371	Q00610	Q01082	Q12907
GO:CC	extracellular membrane-bounded organelle	GO:0065010	7.04981e-49	48.1518	2134	128	82	22090	O75882	P02786	P04406	P05023	P05026	P05362	P05556	P07437	P08238	P09758	P10321	P11142	P14618	P15144	P15924	P16070	P17931	P20337	P21333	P25705	P26038	P27348	P27797	P35222	P35579	P35613	P37802	P39023	P48735	P60709	P61513	P62070	P62937	P63000	P67809	P68104	P68366	P68371	Q00610	Q01082	Q12907
GO:CC	extracellular organelle	GO:0043230	7.04981e-49	48.1518	2134	128	82	22090	O75882	P02786	P04406	P05023	P05026	P05362	P05556	P07437	P08238	P09758	P10321	P11142	P14618	P15144	P15924	P16070	P17931	P20337	P21333	P25705	P26038	P27348	P27797	P35222	P35579	P35613	P37802	P39023	P48735	P60709	P61513	P62070	P62937	P63000	P67809	P68104	P68366	P68371	Q00610	Q01082	Q12907
GO:CC	endomembrane system	GO:0012505	6.76983e-19	18.1694	4742	128	77	22090	A0FGR8	O75396	O75882	O96005	P00533	P02545	P02786	P04406	P05023	P05556	P07437	P08238	P09429	P10321	P11142	P14618	P15144	P15924	P16070	P17706	P17931	P20337	P21333	P27797	P29692	P35221	P35579	P35613	P50454	P62070	P62937	P63000	P63010	P67809	P68104	P68371	Q00610	Q12797	Q12907	Q14573	Q15019
GO:CC	cytosol	GO:0005829	4.4443e-15	14.3522	5457	128	77	22090	A0FGR8	P02545	P04406	P07437	P08238	P09758	P11142	P14618	P16070	P17706	P17931	P21333	P26038	P27348	P27797	P29692	P35221	P35222	P35579	P37802	P39023	P48735	P60709	P61513	P62937	P63000	P63010	P67809	P68104	P68366	P68371	P84098	Q00610	Q00839	Q01082	Q14980	Q15366	Q6NZI2	Q93050	Q9H4L5	Q9P0L0
GO:CC	protein-containing complex	GO:0032991	0.00101087	2.99531	8527	128	75	22090	O75396	P00533	P02786	P04406	P05023	P05026	P05556	P07437	P08238	P09429	P10321	P11142	P16070	P17931	P21333	P22223	P25705	P27348	P27797	P29692	P35221	P35222	P35579	P39023	P50454	P60709	P61513	P62937	P63000	P63010	P67809	P68104	P84098	Q00610	Q00839	Q01082	Q04912	Q12797	Q14573	Q14980	Q15019
GO:CC	intracellular organelle lumen	GO:0070013	0.00640371	2.19357	6656	128	61	22090	P00533	P02545	P07437	P08238	P09429	P11142	P14618	P17706	P17931	P21333	P25705	P27797	P29692	P35222	P35579	P39023	P48735	P50454	P60709	P62937	P67809	P68104	P68371	P84098	Q00839	Q01082	Q01844	Q12797	Q14573	Q14980	Q15019	Q15366	Q6NZI2	Q93050	Q9UIQ6	Q9UNQ0	B0I1T2	O00116	O00571	O43707	P04844
GO:CC	membrane-enclosed lumen	GO:0031974	0.00640371	2.19357	6656	128	61	22090	P00533	P02545	P07437	P08238	P09429	P11142	P14618	P17706	P17931	P21333	P25705	P27797	P29692	P35222	P35579	P39023	P48735	P50454	P60709	P62937	P67809	P68104	P68371	P84098	Q00839	Q01082	Q01844	Q12797	Q14573	Q14980	Q15019	Q15366	Q6NZI2	Q93050	Q9UIQ6	Q9UNQ0	B0I1T2	O00116	O00571	O43707	P04844
GO:CC	organelle lumen	GO:0043233	0.00640371	2.19357	6656	128	61	22090	P00533	P02545	P07437	P08238	P09429	P11142	P14618	P17706	P17931	P21333	P25705	P27797	P29692	P35222	P35579	P39023	P48735	P50454	P60709	P62937	P67809	P68104	P68371	P84098	Q00839	Q01082	Q01844	Q12797	Q14573	Q14980	Q15019	Q15366	Q6NZI2	Q93050	Q9UIQ6	Q9UNQ0	B0I1T2	O00116	O00571	O43707	P04844
GO:CC	cytoplasmic vesicle	GO:0031410	1.13662e-21	20.9444	2476	128	60	22090	O75396	P00533	P02786	P05023	P05556	P07437	P08238	P09429	P10321	P11142	P14618	P15144	P15924	P16070	P17706	P17931	P20337	P27797	P35221	P35579	P35613	P62937	P63000	P63010	P68104	P68371	Q00610	Q12907	Q14573	Q15019	Q15758	Q93050	Q9BVK6	Q9P0L0	Q9UIQ6	O00571	O43707	O60610	O95782	P06744	P07900
GO:CC	intracellular vesicle	GO:0097708	1.26309e-21	20.8986	2481	128	60	22090	O75396	P00533	P02786	P05023	P05556	P07437	P08238	P09429	P10321	P11142	P14618	P15144	P15924	P16070	P17706	P17931	P20337	P27797	P35221	P35579	P35613	P62937	P63000	P63010	P68104	P68371	Q00610	Q12907	Q14573	Q15019	Q15758	Q93050	Q9BVK6	Q9P0L0	Q9UIQ6	O00571	O43707	O60610	O95782	P06744	P07900
GO:CC	organelle membrane	GO:0031090	6.77326e-11	10.1692	3734	128	57	22090	A0FGR8	O75396	P00533	P02545	P02786	P04406	P05023	P05026	P05556	P10321	P11142	P15144	P15924	P16070	P17931	P20337	P25705	P27797	P35613	P62070	P63000	P63010	P68104	Q00610	Q12797	Q12907	Q14573	Q15019	Q16706	Q5JTV8	Q8TCT9	Q93050	Q9BVK6	Q9H4L5	Q9NQC3	Q9P0L0	Q9UIQ6	Q9UNQ0	O00116	O60610	O95782
GO:CC	cell junction	GO:0030054	1.0576e-20	19.9757	2214	128	56	22090	O96005	P00533	P05023	P05026	P05362	P05556	P11142	P15924	P16070	P20337	P21333	P22223	P26038	P27348	P27797	P35221	P35222	P35579	P35613	P39023	P60709	P61513	P62070	P62937	P63000	P63010	P84098	Q00610	Q01082	Q15019	Q15366	Q93050	Q9BVK6	Q9NQC3	Q9P0L0	Q9Y624	O43707	O95782	P11166	P12814	P15311
GO:CC	cell projection	GO:0042995	6.79956e-15	14.1675	2329	128	50	22090	P00533	P05023	P05026	P05556	P08238	P11142	P14618	P16070	P21333	P26038	P35221	P35222	P35579	P35613	P60709	P63000	P68104	Q00839	Q01082	Q14980	Q15019	Q9H4L5	Q9NQC3	Q9UNQ0	B0I1T2	O00571	O43707	O60610	O95782	P04350	P06744	P07900	P10809	P11169	P12814	P15311	P18206	P46940	P49841	P50991	P54709
GO:CC	plasma membrane bounded cell projection	GO:0120025	8.12844e-13	12.09	2217	128	46	22090	P00533	P05023	P05026	P05556	P08238	P11142	P14618	P16070	P21333	P26038	P35221	P35222	P35579	P35613	P60709	P63000	P68104	Q00839	Q01082	Q14980	Q15019	Q9H4L5	Q9NQC3	Q9UNQ0	B0I1T2	O00571	O43707	O60610	O95782	P04350	P06744	P07900	P10809	P12814	P15311	P46940	P49841	P54709	P61586	P63244	Q13557
GO:CC	anchoring junction	GO:0070161	2.18907e-24	23.6597	903	128	42	22090	P00533	P05026	P05362	P05556	P11142	P15924	P16070	P21333	P22223	P26038	P27348	P27797	P35221	P35222	P35579	P35613	P39023	P60709	P61513	P62070	P62937	P63000	P84098	Q00610	Q15366	Q9NQC3	Q9P0L0	Q9Y624	O43707	P11166	P12814	P15311	P16422	P18206	P23284	P46940	P61586	P61978	Q12864	Q14247	Q9HCM4
GO:CC	bounding membrane of organelle	GO:0098588	1.87093e-10	9.72794	2160	128	42	22090	O75396	P00533	P02786	P05556	P10321	P11142	P15144	P15924	P16070	P17931	P20337	P27797	P35613	P62070	P63000	P63010	P68104	Q00610	Q12797	Q12907	Q14573	Q15019	Q16706	Q93050	Q9BVK6	Q9P0L0	Q9UIQ6	O00116	O60610	O95782	P06733	P06744	P11166	P11169	P46940	P53618	P61586	Q13557	Q92896	Q99829	Q9H4M9
GO:CC	cytoskeleton	GO:0005856	2.63194e-08	7.57972	2407	128	41	22090	P02545	P04406	P07437	P15924	P21333	P26038	P35221	P35222	P35579	P37802	P60709	P63000	P68104	P68366	P68371	Q00610	Q00839	Q01082	Q04912	Q14980	Q15019	Q9P0L0	B0I1T2	O00571	O43707	O60610	P04350	P11166	P12814	P15311	P18206	P46940	P49841	P50991	P61586	P61978	Q14247	Q92896	Q9BUF5	Q9HCM4	Q9Y490
GO:CC	plasma membrane region	GO:0098590	1.83345e-16	15.7367	1304	128	40	22090	P00533	P02786	P05023	P05026	P05556	P09758	P11142	P15924	P16070	P26038	P35221	P35222	P35579	P35613	P63000	P63010	P68104	Q00610	Q01082	Q15019	Q15758	Q6NZI2	Q9UNQ0	O60610	O95782	P06744	P07900	P10809	P11166	P15311	P16422	P46940	P54709	P61586	Q12864	Q14247	Q9H4M9	Q9HCM4	Q9Y2J0	Q9Y490
GO:CC	secretory vesicle	GO:0099503	4.52786e-18	17.3441	1039	128	38	22090	P07437	P08238	P09429	P10321	P11142	P14618	P15144	P15924	P16070	P17931	P20337	P27797	P35221	P35579	P35613	P62937	P63000	P68104	P68371	Q14573	Q15019	Q93050	Q9BVK6	Q9P0L0	O00571	O43707	O60610	P06744	P07900	P10809	P11169	P12814	P18206	P46940	P53618	P61586	Q99829	Q9Y2J0
GO:CC	secretory granule	GO:0030141	1.03984e-17	16.983	871	128	35	22090	P07437	P08238	P09429	P10321	P11142	P14618	P15144	P15924	P16070	P17931	P27797	P35221	P35579	P35613	P62937	P63000	P68104	P68371	Q14573	Q93050	Q9P0L0	O00571	O43707	O60610	P06744	P07900	P10809	P11169	P12814	P18206	P46940	P53618	P61586	Q99829	Q9Y2J0
GO:CC	focal adhesion	GO:0005925	1.1935e-25	24.9232	421	128	33	22090	P00533	P05362	P05556	P11142	P16070	P21333	P26038	P27348	P27797	P35221	P35222	P35579	P35613	P39023	P60709	P61513	P62070	P62937	P63000	P84098	Q00610	Q15366	O43707	P12814	P15311	P18206	P23284	P46940	P61586	P61978	Q14247	Q9HCM4	Q9Y490
GO:CC	cell-substrate junction	GO:0030055	2.55915e-25	24.5919	431	128	33	22090	P00533	P05362	P05556	P11142	P16070	P21333	P26038	P27348	P27797	P35221	P35222	P35579	P35613	P39023	P60709	P61513	P62070	P62937	P63000	P84098	Q00610	Q15366	O43707	P12814	P15311	P18206	P23284	P46940	P61586	P61978	Q14247	Q9HCM4	Q9Y490
GO:CC	endoplasmic reticulum	GO:0005783	0.000130226	3.8853	2041	128	31	22090	A0FGR8	O75396	P00533	P05023	P09429	P10321	P14618	P17706	P27797	P29692	P35613	P50454	P62070	P63000	P67809	Q12797	Q12907	Q14573	Q6NZI2	Q8TCT9	Q9BVK6	Q9H4L5	Q9NQC3	Q9P0L0	P04844	P23284	P27824	P53618	P61586	Q13557	Q14247
GO:CC	cytoplasmic vesicle membrane	GO:0030659	2.65876e-09	8.57532	1213	128	30	22090	O75396	P00533	P02786	P05556	P10321	P11142	P15144	P15924	P16070	P17931	P20337	P27797	P35613	P63000	P63010	Q00610	Q14573	Q93050	Q9P0L0	Q9UIQ6	O60610	O95782	P11169	P46940	P53618	P61586	Q13557	Q99829	Q9H4M9	Q9Y2J0
GO:CC	vesicle membrane	GO:0012506	3.7572e-09	8.42514	1230	128	30	22090	O75396	P00533	P02786	P05556	P10321	P11142	P15144	P15924	P16070	P17931	P20337	P27797	P35613	P63000	P63010	Q00610	Q14573	Q93050	Q9P0L0	Q9UIQ6	O60610	O95782	P11169	P46940	P53618	P61586	Q13557	Q99829	Q9H4M9	Q9Y2J0
GO:CC	supramolecular complex	GO:0099080	9.45428e-08	7.02437	1404	128	30	22090	P02545	P07437	P15924	P21333	P35222	P35579	P60709	P63000	P67809	P68366	P68371	Q00610	Q00839	Q01082	Q14980	Q15019	O00571	O43707	O60610	P04350	P06733	P11166	P12814	P15311	P18206	P46940	P50991	P61978	Q14247	Q9BUF5
GO:CC	synapse	GO:0045202	2.07095e-07	6.68383	1451	128	30	22090	O96005	P05023	P05556	P11142	P20337	P21333	P27348	P35222	P35579	P60709	P61513	P63000	P63010	P84098	Q01082	Q15019	Q15366	Q93050	Q9BVK6	Q9NQC3	O95782	P11166	P12814	P49841	P54578	P61586	P62244	P62910	Q14247	Q9Y2J0
GO:CC	cell surface	GO:0009986	2.70303e-10	9.56815	955	128	28	22090	O96005	P00533	P02786	P05187	P05362	P05556	P08238	P09429	P10321	P15144	P16070	P17931	P25705	P26038	P27797	Q00839	Q04912	Q12907	Q8TCT9	Q9UNQ0	P06733	P07900	P10809	P16422	P54578	Q12864	Q9HDC9	Q9Y490
GO:CC	membrane protein complex	GO:0098796	3.94071e-06	5.40443	1357	128	27	22090	O75396	P00533	P02786	P05023	P05026	P05556	P09429	P10321	P21333	P22223	P25705	P27797	P35221	P35222	P63000	P63010	Q00610	Q12797	Q8TCT9	Q93050	O95782	P04844	P10809	P53618	P54709	Q12864	Q14247
GO:CC	supramolecular fiber	GO:0099512	3.08853e-07	6.51025	1034	128	25	22090	P02545	P07437	P15924	P21333	P35222	P35579	P63000	P68366	P68371	Q00610	Q00839	Q01082	Q14980	O43707	O60610	P04350	P06733	P11166	P12814	P15311	P18206	P46940	P50991	Q14247	Q9BUF5
GO:CC	supramolecular polymer	GO:0099081	3.6158e-07	6.4418	1042	128	25	22090	P02545	P07437	P15924	P21333	P35222	P35579	P63000	P68366	P68371	Q00610	Q00839	Q01082	Q14980	O43707	O60610	P04350	P06733	P11166	P12814	P15311	P18206	P46940	P50991	Q14247	Q9BUF5
GO:CC	Golgi apparatus	GO:0005794	0.00475376	2.32296	1613	128	24	22090	O75396	O75882	P00533	P05023	P10321	P16070	P20337	P21333	P35613	P62070	P63000	Q00610	Q12907	Q16706	Q6P4E1	Q93050	Q9BVK6	Q9P0L0	O95782	P11166	P53618	Q14247	Q92896	Q9Y2J0
GO:CC	organelle subcompartment	GO:0031984	0.0048102	2.31784	1505	128	23	22090	A0FGR8	O75396	P00533	P10321	P21333	P27797	P35613	P63000	Q00610	Q12797	Q12907	Q14573	Q16706	Q8TCT9	Q9BVK6	Q9H4L5	Q9NQC3	Q9P0L0	P04844	P27824	P53618	P61586	Q13557
GO:CC	cell-cell junction	GO:0005911	7.42777e-11	10.1291	517	128	22	22090	P05026	P05556	P15924	P21333	P22223	P26038	P35221	P35222	P35579	P60709	Q9P0L0	Q9Y624	P11166	P12814	P15311	P16422	P18206	P46940	P61586	Q12864	Q9HCM4	Q9Y490
GO:CC	perinuclear region of cytoplasm	GO:0048471	6.66901e-08	7.17594	733	128	22	22090	P00533	P02545	P02786	P04406	P05556	P08238	P11142	P20337	P21333	P26038	P27797	P35222	Q93050	Q9H4L5	Q9P0L0	Q9UIQ6	O43707	P07900	P15311	P23284	P63244	Q9H4M9
GO:CC	neuron projection	GO:0043005	0.00152163	2.81769	1299	128	22	22090	P05023	P05556	P08238	P11142	P21333	P35613	P60709	P63000	Q00839	Q01082	Q14980	Q15019	Q9NQC3	P04350	P07900	P46940	P49841	P61586	P63244	Q13557	Q14247	Q9Y2J0
GO:CC	nuclear outer membrane-endoplasmic reticulum membrane network	GO:0042175	0.00172306	2.7637	1208	128	21	22090	A0FGR8	O75396	P00533	P10321	P27797	P35613	P63000	Q12797	Q12907	Q14573	Q8TCT9	Q9BVK6	Q9H4L5	Q9NQC3	Q9P0L0	P04844	P06733	P27824	P53618	P61586	Q13557
GO:CC	cell leading edge	GO:0031252	1.52544e-10	9.81661	424	128	20	22090	P00533	P05556	P16070	P35221	P35222	P35579	P60709	P63000	P68104	Q01082	B0I1T2	O00571	O60610	P12814	P15311	P46940	P61586	Q14247	Q9HCM4	Q9Y490
GO:CC	actin cytoskeleton	GO:0015629	3.2004e-09	8.4948	501	128	20	22090	P21333	P35221	P35579	P37802	P60709	P63000	P68104	Q01082	Q04912	Q15019	B0I1T2	O43707	O60610	P11166	P12814	P15311	P18206	P46940	P61978	Q14247
GO:CC	side of membrane	GO:0098552	3.68433e-07	6.43364	656	128	20	22090	A0FGR8	O96005	P02786	P05362	P05556	P10321	P11142	P15144	P27797	P35579	P63010	P68104	Q14573	Q8TCT9	Q9UNQ0	O95782	P15311	P27824	P46940	P61586
GO:CC	endoplasmic reticulum membrane	GO:0005789	0.00453965	2.34298	1185	128	20	22090	A0FGR8	O75396	P00533	P10321	P27797	P35613	P63000	Q12797	Q12907	Q14573	Q8TCT9	Q9BVK6	Q9H4L5	Q9NQC3	Q9P0L0	P04844	P27824	P53618	P61586	Q13557
GO:CC	endoplasmic reticulum subcompartment	GO:0098827	0.00488261	2.31135	1191	128	20	22090	A0FGR8	O75396	P00533	P10321	P27797	P35613	P63000	Q12797	Q12907	Q14573	Q8TCT9	Q9BVK6	Q9H4L5	Q9NQC3	Q9P0L0	P04844	P27824	P53618	P61586	Q13557
GO:CC	microtubule cytoskeleton	GO:0015630	0.0410846	1.38632	1388	128	20	22090	P04406	P07437	P35222	P35579	P68366	P68371	Q00610	Q00839	Q14980	Q15019	Q9P0L0	O00571	O60610	P04350	P15311	P46940	P49841	P50991	Q14247	Q9BUF5
GO:CC	basal plasma membrane	GO:0009925	7.41165e-13	12.1301	277	128	19	22090	P00533	P02786	P05023	P05026	P09758	P15924	P16070	P26038	P35222	P35613	Q15758	O95782	P07900	P11166	P15311	P16422	P46940	P54709	Q12864
GO:CC	basal part of cell	GO:0045178	2.49004e-12	11.6038	296	128	19	22090	P00533	P02786	P05023	P05026	P09758	P15924	P16070	P26038	P35222	P35613	Q15758	O95782	P07900	P11166	P15311	P16422	P46940	P54709	Q12864
GO:CC	cell cortex	GO:0005938	7.26497e-12	11.1388	314	128	19	22090	P21333	P35222	P35579	P60709	P63000	P68104	Q01082	Q12797	Q14980	Q15019	O43707	P06733	P11166	P12814	P15311	P18206	P46940	P61586	Q14247
GO:CC	endosome	GO:0005768	0.00276953	2.55759	1047	128	19	22090	P00533	P02786	P05556	P09429	P10321	P11142	P17706	P20337	P35613	P63000	P63010	Q00610	Q93050	Q9UIQ6	O95782	P10809	P15311	P61586	Q9H4M9
GO:CC	ficolin-1-rich granule	GO:0101002	7.9225e-15	14.1011	184	128	18	22090	P08238	P09429	P11142	P14618	P15924	P17931	P62937	P63000	P68104	Q93050	O00571	O60610	P06744	P07900	P11169	P18206	P53618	P61586
GO:CC	cell projection membrane	GO:0031253	6.99062e-10	9.15548	354	128	18	22090	P00533	P05556	P16070	P26038	P35222	P63000	P68104	Q01082	Q15019	Q9UNQ0	O60610	P06744	P07900	P15311	P61586	Q9H4M9	Q9HCM4	Q9Y490
GO:CC	plasma membrane protein complex	GO:0098797	4.83476e-05	4.31563	715	128	18	22090	P00533	P02786	P05023	P05026	P05556	P09429	P10321	P21333	P22223	P35221	P35222	P63000	P63010	Q00610	O95782	P54709	Q12864	Q14247
GO:CC	polymeric cytoskeletal fiber	GO:0099513	0.000218538	3.66047	793	128	18	22090	P02545	P07437	P15924	P21333	P63000	P68366	P68371	Q00610	Q00839	Q14980	O60610	P04350	P12814	P15311	P46940	P50991	Q14247	Q9BUF5
GO:CC	melanosome	GO:0042470	2.60846e-17	16.5836	111	128	17	22090	O75396	P02786	P05023	P05556	P08238	P11142	P35613	P63000	Q00610	Q15758	Q93050	P07900	P11166	P23284	P27824	P50991	P54709
GO:CC	pigment granule	GO:0048770	2.60846e-17	16.5836	111	128	17	22090	O75396	P02786	P05023	P05556	P08238	P11142	P35613	P63000	Q00610	Q15758	Q93050	P07900	P11166	P23284	P27824	P50991	P54709
GO:CC	basolateral plasma membrane	GO:0016323	1.85453e-11	10.7318	244	128	17	22090	P00533	P02786	P05023	P05026	P15924	P16070	P26038	P35222	P35613	O95782	P07900	P11166	P15311	P16422	P46940	P54709	Q12864
GO:CC	somatodendritic compartment	GO:0036477	0.0024201	2.61617	849	128	17	22090	P05556	P08238	P11142	P21333	P63000	Q00839	Q14573	Q14980	P04350	P07900	P09104	P11169	P49841	P61586	P63244	Q14247	Q9Y2J0
GO:CC	secretory granule membrane	GO:0030667	1.10965e-08	7.95481	312	128	16	22090	P10321	P15144	P15924	P16070	P17931	P35613	P63000	Q14573	Q93050	Q9P0L0	O60610	P11169	P46940	P53618	P61586	Q99829
GO:CC	postsynapse	GO:0098794	0.000296085	3.52858	644	128	16	22090	P05023	P05556	P11142	P21333	P35222	P60709	P63000	P63010	Q01082	Q15366	Q9NQC3	O95782	P49841	P61586	Q14247	Q9Y2J0
GO:CC	vacuole	GO:0005773	0.00813513	2.08964	838	128	16	22090	P07437	P11142	P15144	P27797	P63010	P68104	P68371	Q00610	Q04912	Q93050	Q9P0L0	Q9UIQ6	O95782	P07900	Q99829	Q9UHG3
GO:CC	vesicle lumen	GO:0031983	1.94381e-07	6.71135	324	128	15	22090	P00533	P07437	P08238	P09429	P11142	P14618	P62937	P68104	P68371	O00571	O43707	P06744	P07900	P12814	P18206
GO:CC	lytic vacuole	GO:0000323	0.00804102	2.09469	745	128	15	22090	P07437	P11142	P15144	P27797	P63010	P68104	P68371	Q00610	Q93050	Q9P0L0	Q9UIQ6	O95782	P07900	Q99829	Q9UHG3
GO:CC	lysosome	GO:0005764	0.00804102	2.09469	745	128	15	22090	P07437	P11142	P15144	P27797	P63010	P68104	P68371	Q00610	Q93050	Q9P0L0	Q9UIQ6	O95782	P07900	Q99829	Q9UHG3
GO:CC	membrane raft	GO:0045121	3.47593e-07	6.45893	285	128	14	22090	P00533	P05023	P05362	P05556	P07437	P25705	P35221	P35222	P50454	Q6NZI2	Q9UNQ0	P11166	P15311	P18206
GO:CC	membrane microdomain	GO:0098857	3.63713e-07	6.43924	286	128	14	22090	P00533	P05023	P05362	P05556	P07437	P25705	P35221	P35222	P50454	Q6NZI2	Q9UNQ0	P11166	P15311	P18206
GO:CC	secretory granule lumen	GO:0034774	1.53866e-06	5.81286	320	128	14	22090	P07437	P08238	P09429	P11142	P14618	P62937	P68104	P68371	O00571	O43707	P06744	P07900	P12814	P18206
GO:CC	cytoplasmic vesicle lumen	GO:0060205	1.73271e-06	5.76127	323	128	14	22090	P07437	P08238	P09429	P11142	P14618	P62937	P68104	P68371	O00571	O43707	P06744	P07900	P12814	P18206
GO:CC	apical part of cell	GO:0045177	0.000176968	3.75211	470	128	14	22090	P05023	P05026	P16070	P26038	P35222	Q14573	Q9UNQ0	O95782	P07900	P11166	P15311	P16422	P46940	P54709
GO:CC	cortical cytoskeleton	GO:0030863	1.66512e-11	10.7786	108	128	13	22090	P21333	P35579	P60709	P68104	Q01082	Q14980	O43707	P11166	P12814	P15311	P18206	P46940	Q14247
GO:CC	ruffle	GO:0001726	1.311e-08	7.8824	181	128	13	22090	P00533	P05556	P35579	P63000	P68104	O60610	P12814	P15311	P46940	P61586	Q14247	Q9HCM4	Q9Y490
GO:CC	coated vesicle	GO:0030135	9.19862e-06	5.03628	310	128	13	22090	O75396	P00533	P02786	P10321	P11142	P63010	Q00610	Q12907	Q93050	Q9BVK6	O95782	P10809	P53618
GO:CC	endocytic vesicle	GO:0030139	2.89177e-05	4.53884	342	128	13	22090	O75396	P00533	P02786	P10321	P27797	P63010	Q00610	Q93050	O95782	P07900	Q13557	Q14247	Q9H4M9
GO:CC	nuclear envelope	GO:0005635	0.00209619	2.67857	502	128	13	22090	P00533	P02545	P04406	P07437	P27797	Q14573	Q5JTV8	Q9H4L5	Q9NQC3	Q9P0L0	P06733	P27824	Q99829
GO:CC	dendrite	GO:0030425	0.0192037	1.71662	621	128	13	22090	P05556	P08238	P11142	P21333	P63000	Q00839	Q14980	P07900	P49841	P61586	P63244	Q14247	Q9Y2J0
GO:CC	dendritic tree	GO:0097447	0.019837	1.70252	623	128	13	22090	P05556	P08238	P11142	P21333	P63000	Q00839	Q14980	P07900	P49841	P61586	P63244	Q14247	Q9Y2J0
GO:CC	leading edge membrane	GO:0031256	1.67766e-07	6.7753	179	128	12	22090	P00533	P05556	P16070	P63000	P68104	Q01082	B0I1T2	O60610	P15311	P61586	Q9HCM4	Q9Y490
GO:CC	adherens junction	GO:0005912	2.94663e-07	6.53067	188	128	12	22090	P15924	P22223	P26038	P35221	P35222	P35579	P60709	P15311	P18206	Q12864	Q9HCM4	Q9Y490
GO:CC	apical plasma membrane	GO:0016324	0.00120985	2.91727	404	128	12	22090	P05023	P05026	P16070	P26038	Q9UNQ0	O95782	P07900	P11166	P15311	P16422	P46940	P54709
GO:CC	glutamatergic synapse	GO:0098978	0.00207108	2.6838	426	128	12	22090	P05556	P11142	P21333	P35222	P60709	P63000	P63010	Q01082	Q9NQC3	P12814	P49841	P61586
GO:CC	spindle	GO:0005819	0.00232923	2.63279	431	128	12	22090	P07437	P35222	P35579	P68371	Q00610	Q00839	Q14980	Q15019	O60610	P04350	Q14247	Q9BUF5
GO:CC	ficolin-1-rich granule lumen	GO:1904813	8.07033e-07	6.09311	124	128	10	22090	P08238	P09429	P11142	P14618	P62937	P68104	O00571	P06744	P07900	P18206
GO:CC	endocytic vesicle membrane	GO:0030666	5.78155e-05	4.23796	194	128	10	22090	O75396	P00533	P02786	P10321	P27797	P63010	Q00610	Q93050	O95782	Q13557
GO:CC	coated vesicle membrane	GO:0030662	6.98756e-05	4.15567	198	128	10	22090	O75396	P00533	P02786	P10321	P11142	P63010	Q00610	Q93050	O95782	P53618
GO:CC	lamellipodium	GO:0030027	8.03181e-05	4.09519	201	128	10	22090	P05556	P16070	P35221	P35222	P60709	P63000	B0I1T2	O00571	P61586	Q14247
GO:CC	cytoplasmic side of membrane	GO:0098562	0.000137067	3.86307	213	128	10	22090	A0FGR8	P35579	P63010	P68104	Q14573	Q8TCT9	O95782	P15311	P46940	P61586
GO:CC	nuclear membrane	GO:0031965	0.00485975	2.31339	318	128	10	22090	P00533	P02545	P04406	Q14573	Q5JTV8	Q9H4L5	Q9P0L0	P06733	P27824	Q99829
GO:CC	ruffle membrane	GO:0032587	1.95437e-06	5.70899	100	128	9	22090	P00533	P05556	P63000	P68104	O60610	P15311	P61586	Q9HCM4	Q9Y490
GO:CC	cytosolic ribosome	GO:0022626	4.54442e-06	5.34252	110	128	9	22090	P39023	P61513	P68104	P84098	O00571	P18621	P62244	P62910	P63244
GO:CC	brush border	GO:0005903	4.92144e-06	5.30791	111	128	9	22090	P21333	P35579	P60709	Q14573	Q9UNQ0	P07900	P12814	P15311	P18206
GO:CC	endoplasmic reticulum-Golgi intermediate compartment	GO:0005793	2.88714e-05	4.53953	136	128	9	22090	O75396	P09429	P15144	P17706	P27797	P50454	Q12907	Q9BVK6	P53618
GO:CC	cluster of actin-based cell projections	GO:0098862	0.000165918	3.78011	167	128	9	22090	P21333	P35579	P60709	Q14573	Q9UNQ0	P07900	P12814	P15311	P18206
GO:CC	mitotic spindle	GO:0072686	0.000373182	3.42808	184	128	9	22090	P07437	P68371	Q00610	Q00839	Q14980	O60610	P04350	Q14247	Q9BUF5
GO:CC	intercalated disc	GO:0014704	1.78943e-07	6.74728	52	128	8	22090	P05026	P05556	P15924	P35221	P35222	P11166	P12814	P18206
GO:CC	ficolin-1-rich granule membrane	GO:0101003	5.85311e-07	6.23261	60	128	8	22090	P15924	P17931	P63000	Q93050	O60610	P11169	P53618	P61586
GO:CC	cortical actin cytoskeleton	GO:0030864	3.22205e-06	5.49187	74	128	8	22090	P35579	P68104	Q01082	O43707	P11166	P12814	P18206	P46940
GO:CC	cell-cell contact zone	GO:0044291	3.22205e-06	5.49187	74	128	8	22090	P05026	P05556	P15924	P35221	P35222	P11166	P12814	P18206
GO:CC	apical junction complex	GO:0043296	0.000947379	3.02348	154	128	8	22090	P35221	P35222	P60709	Q9P0L0	Q9Y624	P16422	P18206	P61586
GO:CC	tertiary granule	GO:0070820	0.00144379	2.8405	163	128	8	22090	P15924	P17931	P63000	Q93050	O60610	P11169	P53618	P61586
GO:CC	ribosomal subunit	GO:0044391	0.004264	2.37018	189	128	8	22090	P39023	P61513	P84098	O00571	P18621	P62244	P62910	P63244
GO:CC	clathrin-coated vesicle	GO:0030136	0.0100549	1.99762	213	128	8	22090	P00533	P02786	P11142	P63010	Q00610	Q93050	Q9BVK6	O95782
GO:CC	actin-based cell projection	GO:0098858	0.0122446	1.91206	219	128	8	22090	P05556	P16070	P26038	P35222	Q9H4L5	B0I1T2	O95782	P15311
GO:CC	myofibril	GO:0030016	0.0207127	1.68376	236	128	8	22090	P21333	P35222	Q01082	O43707	P06733	P11166	P12814	P18206
GO:CC	contractile fiber	GO:0043292	0.0268779	1.5706	245	128	8	22090	P21333	P35222	Q01082	O43707	P06733	P11166	P12814	P18206
GO:CC	cytoplasmic ribonucleoprotein granule	GO:0036464	0.0354393	1.45051	255	128	8	22090	P07437	P60709	P63000	P67809	Q00839	O00571	P46940	P61978
GO:CC	lateral plasma membrane	GO:0016328	5.79002e-05	4.23732	72	128	7	22090	P05023	P05026	P09758	P35222	Q14980	P16422	P46940
GO:CC	actin filament	GO:0005884	0.00124731	2.90403	113	128	7	22090	P21333	P63000	O60610	P12814	P15311	P46940	Q14247
GO:CC	clathrin-coated vesicle membrane	GO:0030665	0.00365111	2.43757	133	128	7	22090	P00533	P02786	P11142	P63010	Q00610	Q93050	O95782
GO:CC	sarcolemma	GO:0042383	0.00442866	2.35373	137	128	7	22090	P05023	P05026	P05556	P35613	P11166	P18206	Q13557
GO:CC	cytoplasmic side of plasma membrane	GO:0009898	0.0212107	1.67344	175	128	7	22090	A0FGR8	P35579	P63010	O95782	P15311	P46940	P61586
GO:CC	clathrin-coated pit	GO:0005905	0.00141158	2.85029	75	128	6	22090	P02786	P63010	Q00610	O95782	P10809	Q14247
GO:CC	filopodium	GO:0030175	0.010893	1.96285	107	128	6	22090	P05556	P26038	Q9H4L5	B0I1T2	O95782	P15311
GO:CC	lumenal side of membrane	GO:0098576	0.00049286	3.30728	35	128	5	22090	P10321	P11142	P27797	Q8TCT9	P27824
GO:CC	cytosolic large ribosomal subunit	GO:0022625	0.00439668	2.35688	54	128	5	22090	P39023	P61513	P84098	P18621	P62910
GO:CC	photoreceptor inner segment	GO:0001917	0.0156258	1.80616	70	128	5	22090	P05023	P35613	P09104	P11166	Q9HCM4
GO:CC	clathrin-coated endocytic vesicle membrane	GO:0030669	0.016732	1.77645	71	128	5	22090	P00533	P02786	P63010	Q00610	O95782
GO:CC	clathrin-coated endocytic vesicle	GO:0045334	0.0465444	1.33213	88	128	5	22090	P00533	P02786	P63010	Q00610	O95782
GO:CC	fascia adherens	GO:0005916	2.13714e-05	4.67017	8	128	4	22090	P15924	P35222	P12814	P18206
GO:CC	lumenal side of endoplasmic reticulum membrane	GO:0098553	0.00357808	2.44635	25	128	4	22090	P10321	P27797	Q8TCT9	P27824
GO:CC	catenin complex	GO:0016342	0.00866362	2.0623	31	128	4	22090	P22223	P35221	P35222	Q12864
GO:CC	myelin sheath	GO:0043209	0.0385314	1.41419	45	128	4	22090	P05556	Q14573	P04350	P07900
GO:CC	immunological synapse	GO:0001772	0.0420127	1.37662	46	128	4	22090	P05362	P17931	P35579	P15311
GO:CC	sodium:potassium-exchanging ATPase complex	GO:0005890	0.0116304	1.93441	12	128	3	22090	P05023	P05026	P54709
GO:CC	uropod	GO:0001931	0.0150554	1.82231	13	128	3	22090	P26038	P35579	P15311
GO:CC	mitotic spindle midzone	GO:1990023	0.0190803	1.71941	14	128	3	22090	Q00839	Q14980	Q14247
GO:CC	cell trailing edge	GO:0031254	0.0190803	1.71941	14	128	3	22090	P26038	P35579	P15311
GO:CC	pseudopodium	GO:0031143	0.0420541	1.37619	18	128	3	22090	P26038	O43707	P12814
GO:CC	cation-transporting ATPase complex	GO:0090533	0.0497281	1.3034	19	128	3	22090	P05023	P05026	P54709
GO:CC	clathrin coat of coated pit	GO:0030132	0.0497281	1.3034	19	128	3	22090	P63010	Q00610	O95782
[truncated: 81 more columns]
