# Supplementary material for: Protein oxidation of fucose environments (POFE) reveals fucose–protein interactions
Source: Royal Society of Chemistry journal article supplement (doi:10.1039/d3sc06432h), 2024-01-01
Supplement: d3sc06432h3.xlsx [file d3sc06432h3.xlsx]

## Sheet: Sheet1
Protein	Protein ID	Entry Name	Protein_Oxi	Protein_Oxi1	Peptide Sequence	Modified Sequence	Oxidation Site	Modifications	Control_1(H2O2)	Control_2(Fe+H2O2)	5min	10min	15min	30min
sp|Q15019|SEPT2	Q15019	SEPT2	SEPT2_345	Q15019_345	MQAQMQMQMQGGDGDGGALGHHV	MQAQMQM[15.9949]QMQGGDGDGGALGHHV	345	7M(15.9949)	0	0	4850000	11500000	12100000	8890000
sp|Q15758|AAAT	Q15758	AAAT	AAAT_541	Q15758_541	GPAGDATVASEKESVM	GPAGDATVASEKESVM[15.9949]	541	16M(15.9949)	0	0	0	21000000	10900000	22500000
sp|Q9UNQ0|ABCG2	Q9UNQ0	ABCG2	ABCG2_173	Q9UNQ0_173	VIQELGLDKVADSK	VIQELGL[15.9949]DKV[15.9949]ADSK	173	10V(15.9949)	0	0	0	25700000	18300000	66300000
sp|P60709|ACTB	P60709	ACTB	ACTB_152	P60709_152	TTGIVMDSGDGVTHTVPIYEGYALPHAILR	TTGIV[15.9949]MDSGDGVTHTVPIYEGYALPHAILR	152	5V(15.9949)	0	0	0	4340000	3990000	2870000
sp|P60709|ACTB	P60709	ACTB	ACTB_294	P60709_294	DLYANTVLSGGTTMYPGIADR	DLY[15.9949]ANTVLSGGTTMYPGIADR	294	3Y(15.9949)	0	0	0	2530000	5410000	4720000
sp|P60709|ACTB	P60709	ACTB	ACTB_305	P60709_305	KDLYANTVLSGGTTMYPGIADR	KDLYANTVLSGGTTM[15.9949]YPGIADR	305	15M(15.9949)	0	0	4820000	7460000	9520000	6610000
sp|P15144|AMPN	P15144	AMPN	AMPN_212	P15144_212	KVVATTQMQAADAR	KVVATTQM[15.9949]QAADAR	212	8M(15.9949)	0	0	14200000	21200000	18000000	15400000
sp|P15144|AMPN	P15144	AMPN	AMPN_693	P15144_693	QYMPWEAALSSLSYFK	QYM[15.9949]PWEAALSSLSYFK	693	3M(15.9949)	0	0	0	3430000	1670000	3240000
sp|P63010|AP2B1	P63010	AP2B1	AP2B1_886	P63010_886	NVEGQDMLYQSLK	NVEGQDM[15.9949]LYQSLK	886	7M(15.9949)	0	0	0	0	0	1480000
sp|Q12797|ASPH	Q12797	ASPH	ASPH_520	Q12797_520	EGIESGDPGTDDGR	EGIESGDP[15.9949]GTDDGR	520	8P(15.9949)	0	0	0	0	16000000	4210000
sp|P05023|AT1A1	P05023	AT1A1	AT1A1_734	P05023_734	KADIGVAMGIAGSDVSK	KADIGVAM[15.9949]GIAGSDVSK	734	8M(15.9949)	0	0	0	0	4010000	16000000
sp|P05026|AT1B1	P05026	AT1B1	AT1B1_121	P05026_121	DDMIFEDCGDVPSEPK	DDM[15.9949]IFEDCGDVPSEPK	121	3M(15.9949)	0	0	0	2250000	4730000	2030000
sp|P25705|ATPA	P25705	ATPA	ATPA_51	P25705_51	TGTAEMSSILEER	TGTAEM[15.9949]SSILEER	51	6M(15.9949)	0	0	0	0	0	14500000
sp|P35613|BASI	P35613	BASI	BASI_239	P35613_239	SSEHINEGETAMLVCK	SSEHINEGETAM[15.9949]LVCK	239	12M(15.9949)	0	0	16600000	23300000	24000000	21400000
sp|P35613|BASI	P35613	BASI	BASI_287	P35613_287	SELHIENLNMEADPGQYR	SELHI[15.9949]ENLNMEADPGQYR	287	5I(15.9949)	0	0	0	0	899000	3600000
sp|P27797|CALR	P27797	CALR	CALR_250	P27797_250	KPEDWDEEMDGEWEPPVIQNPEYK	KP[15.9949]EDWDEEMDGEWEPPVIQNPEYK	250	2P(15.9949)	0	0	0	0	4580000	2740000
sp|Q6NZI2|CAVN1	Q6NZI2	CAVN1	CAVN1_341	Q6NZI2_341	ATEMVEVGADDDEGGAERGEAGDLR	AT[15.9949]EMVEVGADDDEGGAERGEAGDLR	341	4M(15.9949)	0	0	0	0	6290000	18900000
sp|P16070|CD44	P16070	CD44	CD44_725	P16070_725	ESSETPDQFMTADETR	ESSETPDQFM[15.9949]TADETR	725	10M(15.9949)	0	0	32700000	75800000	75500000	59300000
sp|Q00610|CLH1	Q00610	CLH1	CLH1_1316	Q00610_1316	AHMGMFTELAILYSK	AHMGM[15.9949]FTELAILYSK	1316	5M(15.9949)	0	0	0	0	43100000	42600000
sp|Q00610|CLH1	Q00610	CLH1	CLH1_514	Q00610_514	KVGYTPDWIFLLR	KVGYTP[13.9792]DWIFLLR	514	8W(13.9792)	0	0	0	18300000	13600000	13000000
sp|Q00610|CLH1	Q00610	CLH1	CLH1_590	Q00610_590	LLEMNLMHAPQVADAILGNQMFTHYDR	LLEM[15.9949]NLM[15.9949]HAPQVADAILGNQMFTHYDR	590	4M(15.9949)	0	0	0	88900000	121000000	70100000
sp|Q00610|CLH1	Q00610	CLH1	CLH1_996	Q00610_996	AFMTADLPNELIELLEK	AFM[15.9949]TADLPNELIELLEK	996	3M(15.9949)	0	0	0	3640000	3670000	1830000
sp|O96005|CLPT1	O96005	CLPT1	CLPT1_222	O96005_222	NLLTGETEADPEMIK	NLLTGETEADPEM[15.9949]IK	222	13M(15.9949)	0	0	0	0	3040000	2480000
sp|P35221|CTNA1	P35221	CTNA1	CTNA1_352	P35221_352	QALQDLLSEYMGNAGR	QALQDLLSEYM[15.9949]GNAGR	352	11M(15.9949)	0	0	0	14600000	28300000	23400000
sp|P35221|CTNA1	P35221	CTNA1	CTNA1_560	P35221_560	VIHVVTSEMDNYEPGVYTEK	VIHVV[15.9949]TSEMDNYEPGVYTEK	560	9M(15.9949)	0	0	0	8940000	7450000	8520000
sp|P35222|CTNB1	P35222	CTNB1	CTNB1_553	P35222_553	TSMGGTQQQFVEGVR	TSM[15.9949]GGTQQQFVEGVR	553	3M(15.9949)	0	0	0	18100000	20800000	19400000
sp|P15924|DESP	P15924	DESP	DESP_110	P15924_110	ELDECFAQANDQMEILDSLIR	ELDEC[15.9949]FAQANDQMEILDSLIR	110	5C(15.9949)	0	0	0	0	18700000	9330000
sp|P15924|DESP	P15924	DESP	DESP_62	P15924_62	RGVITDQNSDGYCQTGTMSR	RGVITDQNSDGYCQTGTM[15.9949]SR	62	18M(15.9949)	0	0	9440000	18500000	13300000	10300000
sp|P68104|EF1A1	P68104	EF1A1	EF1A1_276	P68104_276	VETGVLKPGMVVTFAPVNVTTEVK	VET[15.9949]GVLKPGMVVTFAPVNVTTEVK	276	10M(15.9949)	0	0	0	0	43400000	57200000
sp|P68104|EF1A1	P68104	EF1A1	EF1A1_404	P68104_404	SGDAAIVDMVPGK	SGDAAIVDM[15.9949]VPGK	404	9M(15.9949)	0	0	0	29900000	33600000	65400000
sp|P68104|EF1A1	P68104	EF1A1	EF1A1_49	P68104_49	TIEKFEKEAAEMGK	TIEKFEKEAAEM[15.9949]GK	49	12M(15.9949)	0	0	0	71900000	47100000	39600000
sp|P68104|EF1A1	P68104	EF1A1	EF1A1_98	P68104_98	YYVTIIDAPGHRDFIK	YYVTIIDAPGHRDF[31.9898]IK	98	14F(31.9898)	0	0	0	0	32600000	45400000
sp|P29692|EF1D	P29692	EF1D	EF1D_29	P29692_29	FYEQMNGPVAGASR	FYEQM[15.9949]NGPVAGASR	29	5M(15.9949)	0	0	0	0	10300000	1920000
sp|P00533|EGFR	P00533	EGFR	EGFR_318	P00533_318	ACGADSYEMEEDGVRK	ACGADSYEM[15.9949]EEDGVRK	318	9M(15.9949)	0	0	4500000	7660000	10300000	10500000
sp|A0FGR8|ESYT2	A0FGR8	ESYT2	ESYT2_690	A0FGR8_690	SHMSGSPGPGGSNTAPSTPVIGGSDKPGMEEK	SHM[15.9949]SGSPGPGGSNTAPSTPVIGGSDKPGMEEK	690	3M(15.9949)	0	0	13300000	47300000	25900000	21600000
sp|Q01844|EWS	Q01844	EWS	EWS_275	Q01844_275	QDHPSSMGVYGQESGGFSGPGENR	QDHPSSM[15.9949]GVYGQESGGFSGPGENR	275	7M(15.9949)	0	0	0	19600000	5530000	2530000
sp|P04406|G3P	P04406	G3P	G3P_130	P04406_130	RVIISAPSADAPMFVMGVNHEK	RVIISAPSADAP[15.9949]MFVMGVNHEK	130	13M(15.9949)	0	0	0	0	5680000	5060000
sp|Q6P4E1|GOLM2	Q6P4E1	GOLM2	GOLM2_251	Q6P4E1_251	GGDAGMPGIEENDLAK	GGDAGMP[15.9949]GIEENDLAK	251	6M(15.9949)	0	0	0	0	0	7570000
sp|P09429|HMGB1	P09429	HMGB1	HMGB1_13	P09429_13	MSSYAFFVQTCR	M[15.9949]SSYAFFVQTCR	13	1M(15.9949)	0	0	0	0	3330000	7190000
sp|P08238|HS90B	P08238	HS90B	HS90B_466	P08238_466	YHTSQSGDEMTSLSEYVSR	YHTSQSGDEM[15.9949]TSLSEYVSR	466	10M(15.9949)	0	0	0	0	14600000	28000000
sp|P08238|HS90B	P08238	HS90B	HS90B_598	P08238_598	LVSSPCCIVTSTYGWTANMER	LVSSPCCIVTSTYGW[13.9792]TANMER	598	15W(13.9792)	0	0	0	58500000	63100000	49400000
sp|P11142|HSP7C	P11142	HSP7C	HSP7C_237	P11142_237	MVNHFIAEFKR	M[15.9949]VNHFIAEFKR	237	1M(15.9949)	0	0	0	0	115000000	159000000
sp|P11142|HSP7C	P11142	HSP7C	HSP7C_87	P11142_87	RFDDAVVQSDMK	RFDDAVVQSDM[15.9949]K	87	11M(15.9949)	0	0	0	0	44400000	49800000
sp|P05362|ICAM1	P05362	ICAM1	ICAM1_91	P05362_91	VYELSNVQEDSQPMCYSNCPDGQSTAK	VYELSNVQEDSQP[15.9949]MCYSNCPDGQSTAK	91	14M(15.9949)	0	0	0	1440000	1960000	6400000
sp|P48735|IDHP	P48735	IDHP	IDHP_411	P48735_411	VCVETVESGAMTK	VCVETVESGAM[15.9949]TK	411	11M(15.9949)	0	0	0	0	2250000	1080000
sp|P05556|ITB1	P05556	ITB1	ITB1_632	P05556_632	FQGQTCEMCQTCLGVCAEHK	FQGQT[15.9949]CEMCQTCLGVCAEHK	632	8M(15.9949)	0	0	0	4540000	3380000	14800000
sp|Q14573|ITPR3	Q14573	ITPR3	ITPR3_1808	Q14573_1808	STVAVNMNDLGSQPHEDREPVDPTTK	STVAV[15.9949]NMNDLGSQPHEDREPVDPTTK	1808	7M(15.9949)	0	0	1220000	8080000	2330000	5330000
sp|Q14573|ITPR3	Q14573	ITPR3	ITPR3_2608	Q14573_2608	AMSLVSNEGEGEQNEIR	AM[15.9949]SLVSNEGEGEQNEIR	2608	2M(15.9949)	0	0	3900000	13600000	14000000	9470000
sp|Q9Y624|JAM1	Q9Y624	JAM1	JAM1_110	Q9Y624_110	EDTGTYTCMVSEEGGNSYGEVK	EDT[15.9949]GTYTCMVSEEGGNSYGEVK	110	9M(15.9949)	0	0	0	8930000	1610000	788000
sp|Q9UIQ6|LCAP	Q9UIQ6	LCAP	LCAP_63	Q9UIQ6_63	GLGEHEMEEDEEDYESSAK	GLGEH[15.9949]EMEEDEEDYESSAK	63	7M(15.9949)	0	0	0	4810000	8300000	3280000
sp|P17931|LEG3	P17931	LEG3	LEG3_190	P17931_190	QSVFPFESGKPFK	QSVF[+15.9949]PFESGKPFK	190	4F(15.9949)	0	0	1050000	3080000	21700000	28800000
sp|Q12907|LMAN2	Q12907	LMAN2	LMAN2_271	Q12907_271	LPTGYYFGASAGTGDLSDNHDIISMK	LPTGYYFGASAGTGDLSDNHDIISM[15.9949]K	271	25M(15.9949)	0	0	0	0	6370000	5230000
sp|Q12907|LMAN2	Q12907	LMAN2	LMAN2_277	Q12907_277	LFQLMVEHTPDEESIDWTK	LFQLMVEH[15.9949]TPDEESIDWTK	277	5M(15.9949)	0	0	0	0	33400000	27300000
sp|P02545|LMNA	P02545	LMNA	LMNA_200	P02545_200	LQTMKEELDFQK	LQT[15.9949]MKEELDFQK	200	4M(15.9949)	0	0	0	10900000	24200000	19400000
sp|P26038|MOES	P26038	MOES	MOES_467	P26038_467	TAMSTPHVAEPAENEQDEQDENGAEASADLR	T[15.9949]AMSTPHVAEPAENEQDEQDENGAEASADLR	467	3M(15.9949)	0	0	0	0	5980000	1530000
sp|P35579|MYH9	P35579	MYH9	MYH9_161	P35579_161	SMMQDREDQSILCTGESGAGK	SM[15.9949]MQDREDQSILCTGESGAGK	161	2M(15.9949)	0	0	0	0	12000000	13800000
sp|P35579|MYH9	P35579	MYH9	MYH9_329	P35579_329	IMGIPEEEQMGLLR	I[15.9949]MGIPEEEQMGLLR	329	2M(15.9949)	0	0	0	0	6250000	7240000
sp|P35579|MYH9	P35579	MYH9	MYH9_365	P35579_365	NTDQASMPDNTAAQK	NTDQASM[15.9949]PDNTAAQK	365	7M(15.9949)	0	0	0	0	35600000	10400000
sp|P35579|MYH9	P35579	MYH9	MYH9_627	P35579_627	IIGLDQVAGMSETALPGAFK	IIGLDQVAGM[15.9949]SETALPGAFK	627	10M(15.9949)	0	0	0	0	2670000	2190000
sp|P35579|MYH9	P35579	MYH9	MYH9_879	P35579_879	LTEMETLQSQLMAEK	LTEMETLQSQLM[15.9949]AEK	879	12M(15.9949)	0	0	0	0	5310000	5020000
sp|Q14980|NUMA1	Q14980	NUMA1	NUMA1_989	Q14980_989	AALMESQGQQQEER	AALM[15.9949]ESQGQQQEER	989	4M(15.9949)	0	0	11600000	16900000	15500000	11000000
sp|Q9H4L5|OSBL3	Q9H4L5	OSBL3	OSBL3_45	Q9H4L5_45	GEMNYTQEPPVQK	GEM[15.9949]NYTQEPPVQK	45	3M(15.9949)	0	0	0	0	2450000	7360000
sp|P62937|PPIA	P62937	PPIA	PPIA_61	P62937_61	IIPGFMCQGGDFTR	IIPGFM[15.9949]CQGGDFTR	61	6M(15.9949)	0	0	0	0	25800000	10100000
sp|P17706|PTN2	P17706	PTN2	PTN2_337	P17706_337	MQDTMEENSESALR	M[15.9949]QDTMEENSESALR	337	1M(15.9949)	0	0	0	0	1610000	1010000
sp|P20337|RAB3B	P20337	RAB3B	RAB3B_187	P20337_187	MSDSLDTDPSMLGSSK	M[15.9949]SDSLDTDPSMLGSSK	187	1M(15.9949)	0	0	0	1200000	4530000	767000
sp|P63000|RAC1	P63000	RAC1	RAC1_145	P63000_145	LTPITYPQGLAMAK	LTPITYPQGLAM[15.9949]AK	145	12M(15.9949)	0	0	7250000	6740000	12000000	7740000
sp|P39023|RL3	P39023	RL3	RL3_181	P39023_181	AHLMEIQVNGGTVAEK	AHLM[15.9949]EIQVNGGTVAEK	181	4M(15.9949)	0	0	0	0	3380000	13500000
sp|P39023|RL3	P39023	RL3	RL3_206	P39023_206	ERLEQQVPVNQVFGQDEMIDVIGVTK	ERLEQQVP[15.9949]VNQVFGQDEMIDVIGVTK	206	8P(15.9949)	0	0	0	0	983000	3930000
sp|P61513|RL37A	P61513	RL37A	RL37A_61	P61513_61	AVGIWHCGSCMK	AVGIWHCGSCM[15.9949]K	61	11M(15.9949)	0	0	0	0	0	20200000
sp|Q04912|RON	Q04912	RON	RON_104	Q04912_104	SVQSLATGPAGDPGCQTCAACGPGPHGPPGDTDTK	SVQSLATGPAGDPGCQTCAACGPGPHGPPGDTDTK	104	18C(15.994)	0	0	1990000	15900000	4630000	4580000
sp|P62070|RRAS2	P62070	RRAS2	RRAS2_78	P62070_78	LDILDTAGQEEFGAMR	LDILDTAGQEEFGAM[15.9949]R	78	15M(15.9949)	0	0	3420000	2630000	3510000	3610000
sp|Q9NQC3|RTN4	Q9NQC3	RTN4	RTN4_79	Q9NQC3_79	KPAAGLSAAPVPTAPAAGAPLMDFGNDFVPPAPR	KPAAGLSAAPVPTAPAAGAP[15.9949]LMDFGNDFVPPAPR	79	22M(15.9949)	0	0	0	2450000	4370000	2520000
sp|P50454|SERPH	P50454	SERPH	SERPH_57	P50454_57	SAGLAFSLYQAMAK	SAGLAFSLY[15.9949]QAMAK	57	11M(15.9949)	0	0	0	0	0	10000000
sp|Q01082|SPTB2	Q01082	SPTB2	SPTB2_1090	Q01082_1090	TQTAIASEDMPNTLTEAEK	TQTAIASEDM[15.9949]PNTLTEAEK	1090	10M(15.9949)	0	667000	1010000	1110000	1390000	1080000
sp|P09758|TACD2	P09758	TACD2	TACD2_62	P09758_62	ALGSGMAVDCSTLTSK	ALGSGM[15.9949]AVDCSTLTSK	62	6M(15.9949)	0	5500000	16800000	75300000	56700000	47300000
sp|P37802|TAGL2	P37802	TAGL2	TAGL2_189	P37802_189	GASQAGMTGYGMPR	GASQAGM[15.9949]TGYGMPR	189	7M(15.9949)	0	0	0	0	7570000	13100000
sp|P68366|TBA4A	P68366	TBA4A	TBA4A_302	P68366_302	AYHEQLSVAEITNACFEPANQMVK	AYHEQLSVAEITNACFEPANQM[15.9949]VK	302	22M(15.9949)	0	0	0	0	3720000	5560000
sp|P02786|TFR1	P02786	TFR1	TFR1_349	P02786_349	LFGNMEGDCPSDWK	LFGNM[15.9949]EGDCPSDWK	349	5M(15.9949)	0	1200000	10900000	9100000	14100000	11400000
sp|Q9BVK6|TMED9	Q9BVK6	TMED9	TMED9_59	Q9BVK6_59	CFIEEIPDETMVIGNYR	CFIEEIP[15.9949]DETMVIGNYR	59	11M(15.9949)	0	0	0	0	1220000	1210000
sp|Q5JTV8|TOIP1	Q5JTV8	TOIP1	TOIP1_146	Q5JTV8_146	LQQQHSEQPPLQPSPVMTR	LQQQHSEQPPLQPSP[15.9949]VMTR	146	17M(15.9949)	0	0	11000000	24700000	18900000	13700000
sp|Q9P0L0|VAPA	Q9P0L0	VAPA	VAPA_132	Q9P0L0_132	CVFEMPNENDKLNDMEPSK	CVF[15.9949]EMPNENDKLNDMEPSK	132	5M(15.9949)	0	0	11100000	6270000	14000000	7840000
sp|Q9P0L0|VAPA	Q9P0L0	VAPA	VAPA_158	Q9P0L0_158	QDGPMPKPHSVSLNDTETRK	QDGP[15.9949]MPKPHSVSLNDTETRK	158	4P(15.9949)	0	0	10100000	21100000	17500000	19400000
sp|Q93050|VPP1	Q93050	VPP1	VPP1_355	Q93050_355	MQTNQTPPTYNK	M[15.9949]QTNQTPPTYNK	355	1M(15.9949)	0	0	0	9590000	15000000	13800000
sp|P67809|YBOX1	P67809	YBOX1	YBOX1_218	P67809_218	RPQYSNPPVQGEVMEGADNQGAGEQGRPVR	RPQYSNPPVQGEVM[15.9949]EGADNQGAGEQGRPVR	218	14M(15.9949)	0	0	0	25400000	113000000	75600000
