# Supplementary material for: Protein oxidation of fucose environments (POFE) reveals fucose–protein interactions
Source: Royal Society of Chemistry journal article supplement (doi:10.1039/d3sc06432h), 2024-01-01
Supplement: d3sc06432h4.xlsx [file d3sc06432h4.xlsx]

## Sheet: Sheet1
Protein	Protein ID	Entry Name	Protein_Oxi	protein_oxi	Peptide Sequence	Modified Sequence	Oxidation Site	Modifications	Control_1(H2O2)	Control_2(Fe+H2O2)	5 min	10min	15min	30min
sp|P60709|ACTB_HUMAN	P60709	ACTB	ACTB_102		VAPEEHPVLLTEAPLNPK	VAPEEHP[15.9949]VLLTEAPLNPK	102	7P(15.9949)	0	0		0	166000000	187000000
sp|P60709|ACTB_HUMAN	P60709	ACTB	ACTB_120		MTQIMFETFNTPAMYVAIQAVLSLYASGR	MT[15.9949]QIM[15.9949]FETF[15.9949]NTPAMYVAIQAVLSLYASGR	120	2T(15.9949), 5M(15.9949), 9F(15.9949)	0	0		72900000	34600000	30900000
sp|P60709|ACTB_HUMAN	P60709	ACTB	ACTB_172		TTGIVMDSGDGVTHTVPIYEGYALPHAILR	TTGIVMDSGDGVTHTVPIYEGYALP[15.9949]H[15.9949]AILR	172	25P(15.9949), 26H(15.9949)	0	0		46600000	37200000	38500000
sp|P60709|ACTB_HUMAN	P60709	ACTB	ACTB_264		CPEALFQPSFLGMESCGIHETTFNSIMK	CPEALFQP[-30.0105]SF[31.9898]LGMESCGIHETTFNSIM[15.9949]K	264	10F(31.9898), 16C(57.0214), 1C(57.0214), 27M(15.9949), 8P(-30.0105)	0	0		0	51800000	65300000
sp|P60709|ACTB_HUMAN	P60709	ACTB	ACTB_269		FRCPEALFQPSFLGMESCGIHETTFNSIMK	FRCPEALFQPSFLGM[15.9949]ESCGIHETTFNSIMK	269	15M(15.9949), 18C(57.0214), 3C(57.0214)	0	0		328000000	133000000	126000000
sp|P12814|ACTN1_HUMAN	P12814	ACTN1	ACTN1_221		MLDAEDIVGTARPDEK	M[15.9949]LDAEDIVGTARPDEK	221	1M(15.9949)	0	0		0	104000000	102000000
sp|P12814|ACTN1_HUMAN	P12814	ACTN1	ACTN1_748		GISQEQMNEFR	GISQEQM[15.9949]NEFR	748	7M(15.9949)	0	0		39300000	51100000	50000000
sp|O43707|ACTN4_HUMAN	O43707	ACTN4	ACTN4_293		VLAVNQENEHLMEDYEK	VLAVNQENEH[15.9949]LMEDYEK	293	10H(15.9949)	0	0		304000000	111000000	138000000
sp|O43707|ACTN4_HUMAN	O43707	ACTN4	ACTN4_679		ISIEMNGTLEDQLSHLK	ISIEM[15.9949]NGTLEDQLSHLK	679	5M(15.9949)	0	0		117000000	181000000	227000000
sp|O95782|AP2A1_HUMAN	O95782	AP2A1	AP2A1_870		FFQPTEMAAQDFFQR	FFQPTEM[15.9949]AAQDFFQR	870	7M(15.9949)	0	0		0	28400000	23900000
sp|Q9HDC9|APMAP_HUMAN	Q9HDC9	APMAP	APMAP_278		FPNGVQLSPAEDFVLVAETTMAR	FPNGVQLSPAEDFVLVAETTM[15.9949]AR	278	21M(15.9949)	0	0		24700000	30400000	18400000
sp|Q12864|CAD17_HUMAN	Q12864	CAD17	CAD17_34		FSGPLKPMTFSIYEGQEPSQIIFQFK	FSGPLKPM[15.9949]TFSIYEGQEPSQIIFQFK	34	8M(15.9949)	0	0		0	8650000	11300000
sp|P27824|CALX_HUMAN	P27824	CALX	CALX_83		GTLSGWILSK	GTLSGW[31.9898]ILSK	83	6W(31.9898)	0	0		22300000	15800000	12700000
sp|P53618|COPB_HUMAN	P53618	COPB	COPB_2		TAAENVCYTLINVPMDSEPPSEISLK	n[42.0106]TAAENVC[15.9949]YTLINVPMDSEPPSEISLK	2	7C(15.9949), N-term(42.0106)	0	0		18500000	30600000	16400000
sp|O60610|DIAP1_HUMAN	O60610	DIAP1	DIAP1_906		MLSELKDEYDDLAESEQFGVVMGTVPR	M[15.9949]LSELKDEYDDLAESEQFGVVMGTVPR	906	1M(15.9949)	0	0		0	9630000	6120000
sp|Q9HCM4|E41L5_HUMAN	Q9HCM4	E41L5	E41L5_197		FVPIQTEEMELAIFEK	FVPIQTEEM[15.9949]ELAIFEK	197	9M(15.9949)	0	0		0	33200000	31900000
sp|Q9H4M9|EHD1_HUMAN	Q9H4M9	EHD1	EHD1_101		IGPEPTTDSFIAVMHGPTEGVVPGNALVVDPR	IGPEPTTDSFIAVM[15.9949]HGPTEGVVPGNALVVDPR	101	14M(15.9949)	0	0		0	21900000	49600000
sp|P06733|ENOA_HUMAN	P06733	ENOA	ENOA_244		AGYTDKVVIGMDVAASEFFR	AGYTDKVVIGM[15.9949]DVAASEFFR	244	11M(15.9949)	0	0		99400000	189000000	167000000
sp|P06733|ENOA_HUMAN	P06733	ENOA	ENOA_270		YISPDQLADLYK	Y[31.9898]ISPDQLADLYK	270	1Y(31.9898)	0	0		161000000	135000000	132000000
sp|P06733|ENOA_HUMAN	P06733	ENOA	ENOA_94		IDKLMIEMDGTENK	IDKLM[15.9949]IEMDGTENK	94	5M(15.9949)	0	0		0	92700000	135000000
sp|P09104|ENOG_HUMAN	P09104	ENOG	ENOG_137		HIAQLAGNSDLILPVPAFNVINGGSHAGNK	HIAQL[15.9949]AGNSDLILP[13.9792]VPAFNVINGGSHAGNK	137	14P(13.9792), 5L(15.9949)	0	0		16800000	33900000	16900000
sp|P09104|ENOG_HUMAN	P09104	ENOG	ENOG_172		LAMQEFMILPVGAESFR	LAMQEFMILP[-30.0105]VGAESFR	172	10P(-30.0105)	0	0		11300000	6320000	9470000
sp|P15311|EZRI_HUMAN	P15311	EZRI	EZRI_292		ILQLCMGNHELYMR	ILQLCMGNHELYM[15.9949]R	292	13M(15.9949), 5C(57.0214)	0	0		38700000	36400000	25000000
sp|P15311|EZRI_HUMAN	P15311	EZRI	EZRI_305		RKPDTIEVQQMK	RKPDTIEVQQM[15.9949]K	305	11M(15.9949)	0	0		0	34400000	50600000
sp|P21333|FLNA_HUMAN	P21333	FLNA	FLNA_102		QMQLENVSVALEFLDRESIK	QM[15.9949]QLENVSVALEFLDRESIK	102	2M(15.9949)	0	0		47800000	25600000	28900000
sp|P21333|FLNA_HUMAN	P21333	FLNA	FLNA_1958		VTGDDSMR	VTGDDSM[15.9949]R	1958	7M(15.9949)	0	0		0	6410000	8410000
sp|P04406|G3P_HUMAN	P04406	G3P	G3P_130		RVIISAPSADAPMFVMGVNHEK	RVIISAPSADAPM[15.9949]FVMGVNHEK	130	13M(15.9949)	0	0		0	15900000	23800000
sp|P04406|G3P_HUMAN	P04406	G3P	G3P_313		LISWYDNEFGYSNR	LISW[13.9792]YDNEFGYSNR	313	4W(13.9792)	0	0		42300000	29000000	36700000
sp|P04406|G3P_HUMAN	P04406	G3P	G3P_331		VVDLMAHMASKE	VVDLMAHM[15.9949]ASKE	331	8M(15.9949)	0	0		0	127000000	184000000
sp|P06744|G6PI_HUMAN	P06744	G6PI	G6PI_485		LTPFMLGALVAMYEHK	LTPF[15.9949]MLGALVAM[15.9949]YEHK	485	12M(15.9949), 4F(15.9949)	0	0		75300000	56900000	95300000
sp|P49841|GSK3B_HUMAN	P49841	GSK3B	GSK3B_329		LTPLEACAHSFFDELR	L[15.9949]TP[-30.0105]LEACAHSFFDELR	329	1L(15.9949), 3P(-30.0105), 7C(57.0214)	0	0		0	237000000	207000000
sp|P11166|GTR1_HUMAN	P11166	GTR1	GTR1_244		LRGTADVTHDLQEMKEESR	LRGTADVTHDLQEM[15.9949]KEESR	244	14M(15.9949)	0	0		0	81100000	67700000
sp|P61978|HNRPK_HUMAN	P61978	HNRPK	HNRPK_283		DYDDMSPR	DYDDM[15.9949]SPR	283	5M(15.9949)	0	0		0	123000000	225000000
sp|P61978|HNRPK_HUMAN	P61978	HNRPK	HNRPK_42		SRNTDEMVELR	SRNTDEM[15.9949]VELR	42	7M(15.9949)	0	0		28400000	16100000	20000000
sp|Q00839|HNRPU_HUMAN	Q00839	HNRPU	HNRPU_465		EKPYFPIPEEYTFIQNVPLEDR	EKP[13.9792]YFPIPEEYTFIQNVPLEDR	465	3P(13.9792)	0	0		58600000	20100000	26200000
sp|Q00839|HNRPU_HUMAN	Q00839	HNRPU	HNRPU_500		KDCEVVMMIGLPGAGK	KDCEVV[15.9949]MMIGLPGAGK	500	3C(57.0214), 6V(15.9949)	0	0		32200000	46800000	108000000
sp|Q00839|HNRPU_HUMAN	Q00839	HNRPU	HNRPU_537		MMVAGFKK	M[15.9949]MVAGFKK	537	1M(15.9949)	0	0		55900000	91600000	85500000
sp|P07900|HS90A_HUMAN	P07900	HS90A	HS90A_309		NPDDITNEEYGEFYK	NPDDITNEEY[31.9898]GEFYK	309	10Y(31.9898)	0	0		35600000	44600000	26700000
sp|P07900|HS90A_HUMAN	P07900	HS90A	HS90A_474		YYTSASGDEMVSLKDYCTR	YYTSASGDEM[15.9949]VSLKDYCTR	474	10M(15.9949), 17C(57.0214)	0	0		61700000	34700000	42300000
sp|P07900|HS90A_HUMAN	P07900	HS90A	HS90A_606		LVTSPCCIVTSTYGWTANMER	LVTSPCCIVTSTYGW[13.9792]TANMER	606	15W(13.9792), 6C(57.0214), 7C(57.0214)	0	0		16900000	9770000	8900000
sp|P07900|HS90A_HUMAN	P07900	HS90A	HS90A_625		DNSTMGYMAAK	DNSTM[15.9949]GYM[15.9949]AAK	625	5M(15.9949), 8M(15.9949)	0	0		29900000	28600000	55800000
sp|P46940|IQGA1_HUMAN	P46940	IQGA1	IQGA1_1160		FLSAIVSSVDKIPYGMR	FLSAIVSSVDKIPYGM[15.9949]R	1160	16M(15.9949)	0	0		77100000	50900000	48600000
sp|P46940|IQGA1_HUMAN	P46940	IQGA1	IQGA1_31		LTAEEMDER	LTAEEM[15.9949]DER	31	6M(15.9949)	0	0		17500000	12600000	10000000
sp|Q13557|KCC2D_HUMAN	Q13557	KCC2D	KCC2D_392		ICDPGLTAFEPEALGNLVEGMDFHR	ICDPGLTAFEPEALGNLVEGM[15.9949]DFHR	392	21M(15.9949), 2C(57.0214)	0	0		31300000	30300000	20500000
sp|P14618|KPYM_HUMAN	P14618	KPYM	KPYM_2		SKPHSEAGTAFIQTQQLHAAMADTFLEHMCR	n[42.0106]SKPHSEAGTAFIQTQQLH[15.9949]AAMADTFLEH[15.9949]MCR	2	18H(15.9949), 28H(15.9949), 30C(57.0214), N-term(42.0106)	0	0		305000000	422000000	389000000
sp|P14618|KPYM_HUMAN	P14618	KPYM	KPYM_360		AEGSDVANAVLDGADCIMLSGETAKGDYPLEAVR	AEGSDVANAVLDGADCIM[15.9949]LSGETAKGDYPLEAVR	360	16C(57.0214), 18M(15.9949)	0	0		84600000	74100000	52900000
sp|P35579|MYH9_HUMAN	P35579	MYH9	MYH9_144		KRHEMPPHIYAITDTAYR	KRH[15.9949]EMPPHIYAITDTAYR	144	3H(15.9949)	0	0		13300000	9310000	7550000
sp|B0I1T2|MYO1G_HUMAN	B0I1T2	MYO1G	MYO1G_597		NSMVALVENLASKEPFYVR	NSMVALVENLASKEPF[15.9949]YVR	597	16F(15.9949)	0	0		63500000	49600000	41400000
sp|Q15366|PCBP2_HUMAN	Q15366	PCBP2	PCBP2_316		QMSGAQIK	QM[15.9949]SGAQIK	316	2M(15.9949)	0	0		0	22800000	36400000
sp|Q9UHG3|PCYOX_HUMAN	Q9UHG3	PCYOX	PCYOX_221		FLNEMIAPVMR	FLNEMIAPVM[15.9949]R	221	10M(15.9949)	0	0		135000000	138000000	134000000
sp|P23284|PPIB_HUMAN	P23284	PPIB	PPIB_101		VIKDFMIQGGDFTR	VIKDFM[15.9949]IQGGDFTR	101	6M(15.9949)	0	0		158000000	249000000	140000000
sp|P23284|PPIB_HUMAN	P23284	PPIB	PPIB_176		VLEGMEVVR	VLEGM[15.9949]EVVR	176	5M(15.9949)	0	0		0	3090000000	5390000000
sp|P26599|PTBP1_HUMAN	P26599	PTBP1	PTBP1_98		NQAFIEMNTEEAANTMVNYYTSVTPVLR	NQAF[15.9949]IEMNTEEAANTMVNYYTSVTPVLR	98	4F(15.9949)	0	0		0	21100000	9700000
sp|P63244|RACK1_HUMAN	P63244	RACK1	RACK1_2		TEQMTLR	n[42.0106]TEQM[15.9949]TLR	2	4M(15.9949), N-term(42.0106)	0	0		0	55200000	112000000
sp|P61586|RHOA_HUMAN	P61586	RHOA	RHOA_134		MKQEPVKPEEGR	M[15.9949]KQEPVKPEEGR	134	1M(15.9949)	0	0		11400000	14500000	21000000
sp|P62910|RL32_HUMAN	P62910	RL32	RL32_55		FKGQILMPNIGYGSNKK	FKGQILM[15.9949]PNIGYGSNKK	55	7M(15.9949)	0	0		40200000	50600000	30300000
sp|P61513|RL37A_HUMAN	P61513	RL37A	RL37A_69		TVAGGAWTYNTTSAVTVK	TVAGGAW[31.9898]TYNTTSAVTVK	69	7W(31.9898)	0	0		11600000	25600000	12400000
sp|Q9Y2J0|RP3A_HUMAN	Q9Y2J0	RP3A	RP3A_187		PQQPVSEPAAPEQPAPEPK	PQQPVSEPAAP[-30.0105]EQP[13.9792]APEPK	187	11P(-30.0105), 14P(13.9792)	0	0		0	97400000	136000000
sp|P04844|RPN2_HUMAN	P04844	RPN2	RPN2_221		LMDHVGTEPSIKEDQVIQLMNAIFSK	LMDH[15.9949]VGTEPSIKEDQVIQLMNAIFSK	221	4H(15.9949)	0	0		0	88200000	81000000
sp|O75396|SC22B_HUMAN	O75396	SC22B	SC22B_6		VLLTMIAR	VLLTM[-32.0084]IAR	6	5M(-32.0084)	0	0		57400000	490000000	1410000000
sp|P50454|SERPH_HUMAN	P50454	SERPH	SERPH_204		TDGALLVNAMFFKPHWDEK	TDGALLVNAM[15.9949]FFKPHWDEK	204	10M(15.9949)	0	0		52600000	51600000	58000000
sp|Q14247|SRC8_HUMAN	Q14247	SRC8	SRC8_95		FGVEQDRMDK	FGVEQDRM[15.9949]DK	95	8M(15.9949)	0	0		0	22900000	37800000
sp|P49588|SYAC_HUMAN	P49588	SYAC	SYAC_242		SIDTGMGLER	SIDTGM[15.9949]GLER	242	6M(15.9949)	0	0		32100000	83400000	38500000
sp|P49588|SYAC_HUMAN	P49588	SYAC	SYAC_856		QFIDSNPNQPLVILEMESGASAK	QFIDSNPNQP[13.9792]L[15.9949]VILEM[-32.0084]ESGASAK	856	10P(13.9792), 11L(15.9949), 16M(-32.0084)	0	0		40900000	29100000	46400000
sp|P68366|TBA4A_HUMAN	P68366	TBA4A	TBA4A_357		VGINYQPPTVVPGGDLAK	VGINY[31.9898]QPPTVVPGGDLAK	357	5Y(31.9898)	0	0		47000000	26300000	31800000
sp|P68366|TBA4A_HUMAN	P68366	TBA4A	TBA4A_408		AFVHWYVGEGMEEGEFSEAR	AFVHWY[15.9949]VGEGM[15.9949]EEGEFSEAR	408	11M(15.9949), 6Y(15.9949)	0	0		88900000	66200000	40600000
sp|P04350|TBB4A_HUMAN	P04350	TBB4A	TBB4A_363		MAATFIGNSTAIQELFKR	M[-32.0084]AAT[15.9949]F[31.9898]IGNSTAIQELFKR	363	1M(-32.0084), 4T(15.9949), 5F(31.9898)	0	0		489000000	13900000	168000000
sp|P68371|TBB4B_HUMAN	P68371	TBB4B	TBB4B_127		KEAESCDCLQGFQLTHSLGGGTGSGMGTLLISK	KEAESC[15.9949]DCLQGFQLTHSLGGGTGSGMGTLLISK	127	6C(15.9949), 8C(57.0214)	0	0		62400000	54100000	31900000
sp|P68371|TBB4B_HUMAN	P68371	TBB4B	TBB4B_220		LTTPTYGDLNHLVSATMSGVTTCLR	LTTP[-30.0105]TY[31.9898]GDLNHLVSATM[15.9949]SGVTTCLR	220	17M(15.9949), 23C(57.0214), 4P(-30.0105), 6Y(31.9898)	0	0		0	60700000	55300000
sp|P68371|TBB4B_HUMAN	P68371	TBB4B	TBB4B_341		NSSYFVEWIPNNVK	NSSYF[15.9949]VEW[15.9949]IPNNVK	341	5F(15.9949), 8W(15.9949)	0	0		44100000	33400000	50300000
sp|Q9BUF5|TBB6_HUMAN	Q9BUF5	TBB6	TBB6_170		IMNTFSVMPSPK	IMNTFSVM[15.9949]PSPK	170	8M(15.9949)	0	0		385000000	435000000	477000000
sp|P60174|TPIS_HUMAN	P60174	TPIS	TPIS_169		VVLAYEPVWAIGTGK	VVLAYEPVW[31.9898]AIGTGK	169	9W(31.9898)	0	0		53500000	349000000	164000000
sp|P18206|VINC_HUMAN	P18206	VINC	VINC_898		AGEVINQPMMMAAR	AGEVINQPM[15.9949]MMAAR	898	9M(15.9949)	0	0		37000000	36100000	71200000
sp|P17931|LEG3	P17931	LEG3	LEG3_190		QSVFPFESGKPFK	QSVF[+15.9949]PFESGKPFK	190	4F(15.9949)	0	0		9760000	21700000	23700000
